# Supplementary material for: A Bi2S3-embedded gellan gum hydrogel for localized tumor photothermal/antiangiogenic therapy
Source: Royal Society of Chemistry journal article supplement (doi:10.1039/d1tb00257k), 2021-01-01
Supplement: d1tb00257k1.pdf [file d1tb00257k1.pdf]

## Supporting Information

### **Bi<sub>2</sub>S<sub>3</sub>-embedded gellan gum hydrogel for localized tumor photothermal/antiangiogenic therapy**

Yingjiao Wu,<sup>a</sup> Yuqing Liang,<sup>a</sup> Yandi Liu,<sup>a</sup> Yijun Hao,<sup>a</sup> Na Tao,<sup>a</sup> Juan Li,<sup>\*a</sup> Xiaoyi Sun,<sup>a</sup>

Ming Zhou<sup>\*bc</sup> and You-Nian Liu<sup>a</sup>

<sup>a</sup>Hunan Provincial Key Laboratory of Micro & Nano Materials Interface Science,  
College of Chemistry and Chemical Engineering, Central South University, Changsha  
410083, China

<sup>b</sup>Department of Nuclear Medicine, Xiangya Hospital, Central South University,  
Changsha 410008, China

<sup>c</sup>Key Laboratory of Biological Nanotechnology of National Health Commission,  
Xiangya Hospital, Central South University, Changsha 410008, China

\*Corresponding authors. E-mail addresses: [juanli@csu.edu.cn](mailto:juanli@csu.edu.cn) (J. Li),  
[405735@csu.edu.cn](mailto:405735@csu.edu.cn) (M. Zhou).

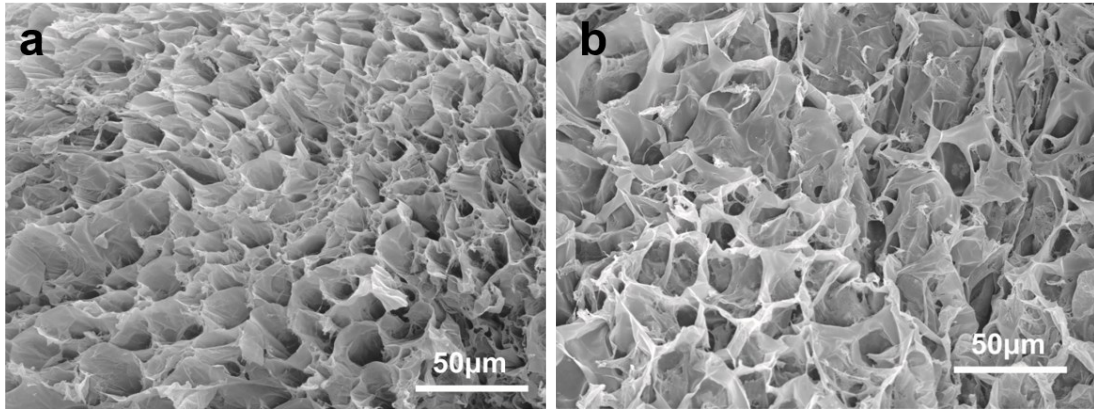

**Fig. S1.** SEM images of a)  $\text{Bi}_2\text{S}_3@\text{GG}$  hydrogel and b)  $\text{SF}/\text{Bi}_2\text{S}_3@\text{GG}$  hydrogel.

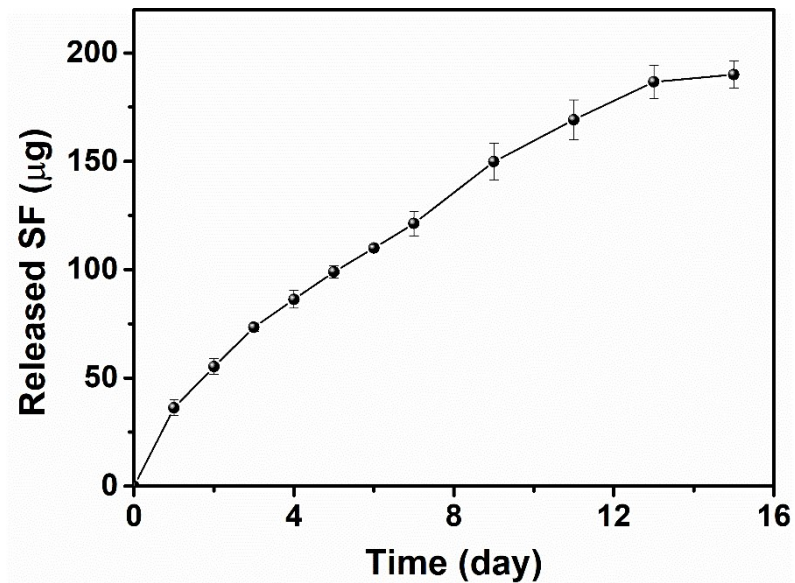

**Fig. S2.** Release behavior of SF from  $\text{SF}/\text{Bi}_2\text{S}_3@\text{GG}$  hydrogel.

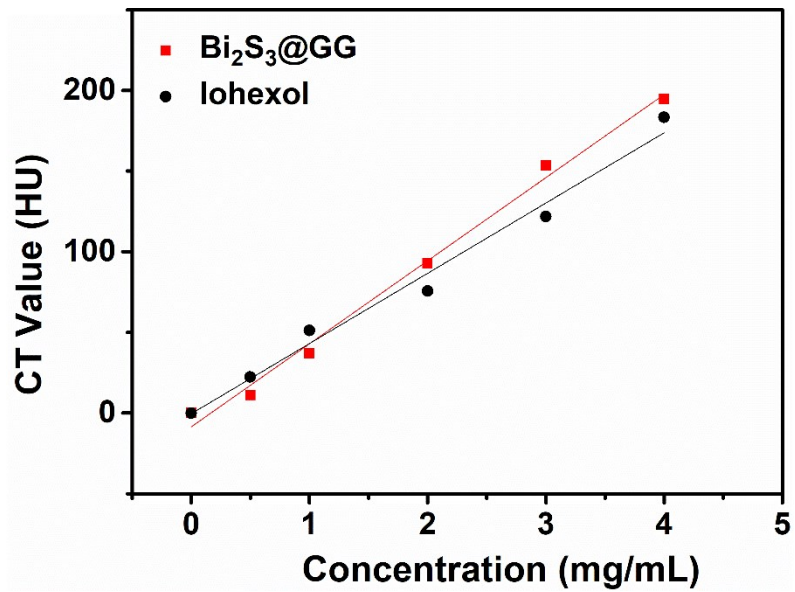

**Fig. S3.** X-ray attenuation of intensity in Hounsfield units (HU) of  $\text{Bi}_2\text{S}_3@\text{GG}$  hydrogel

and iohexol at different Bi or I concentrations.

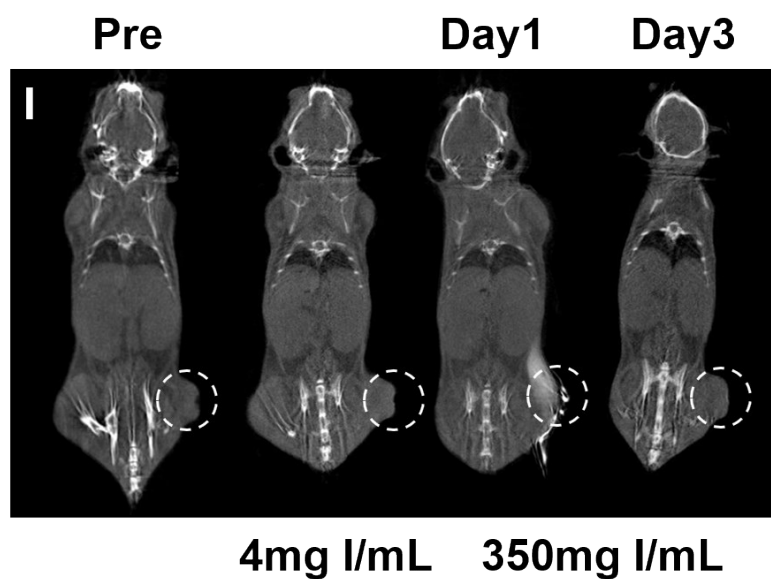

**Fig. S4.** CT images of tumor-bearing mice intratumorally injected with iohexol.

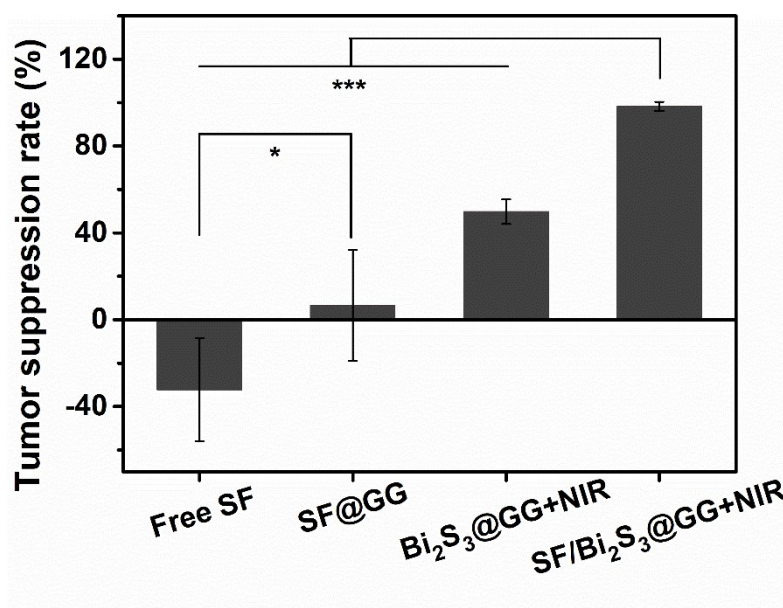

**Fig. S5.** Tumor suppression rate after different treatments (n = 4; \* $p < 0.05$ , \*\* $p < 0.01$ ,

\*\*\* $p < 0.001$ ).

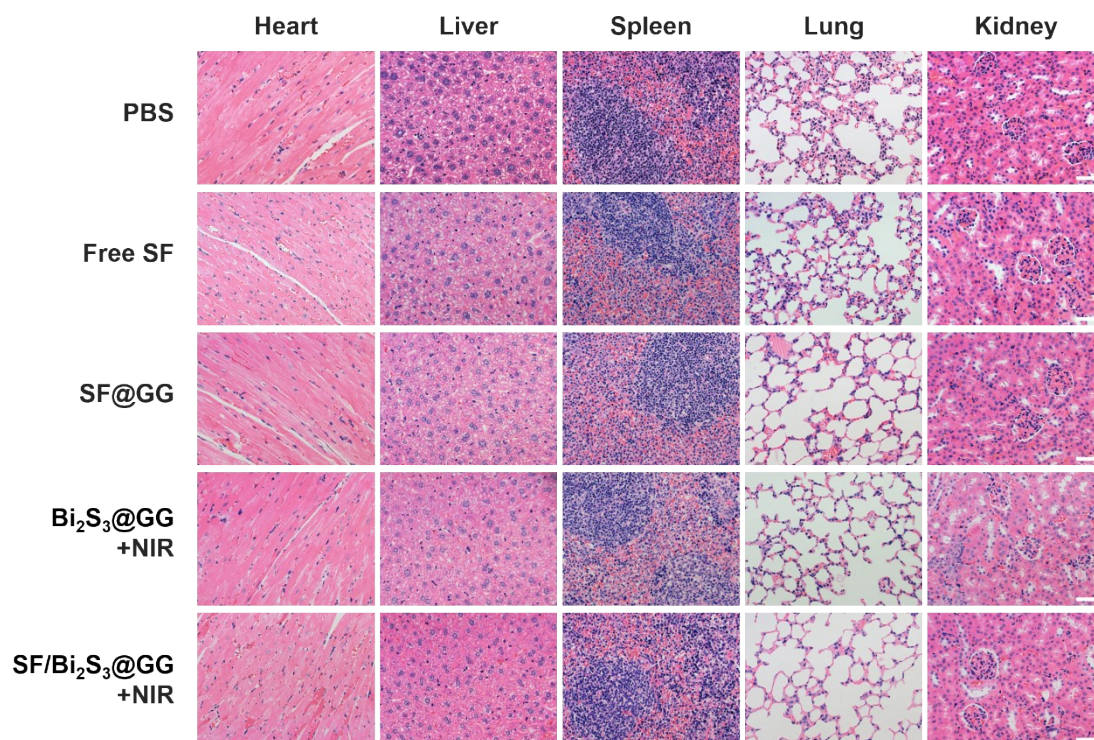

**Fig. S6.** H & E staining images of the major organs (heart, liver, spleen, lung, and kidney) of mice with different treatments. The scale bar is 100  $\mu\text{m}$ .
